# Supplementary material for: Magnesium-Modified Co3O4 Catalyst with Remarkable Performance for Toluene Low Temperature Deep Oxidation
Source: MDPI journal article supplement (doi:10.3390/catal12040411), 2022-04-07
Supplement: s1 [file s1]

Archive with 1 entries (1 files):
- catalysts-1627502-si- v3.pdf
