# Supplementary material for: Magnesium-Modified Co3O4 Catalyst with Remarkable Performance for Toluene Low Temperature Deep Oxidation
Source: MDPI journal article supplement (doi:10.3390/catal12040411), 2022-04-07
Supplement: s1 [file s1 › catalysts-1627502-si- v3.pdf]

# Electronic Supporting Information

## **Magnesium-modified Co<sub>3</sub>O<sub>4</sub> catalyst with remarkable performance for toluene low temperature deep oxidation**

Zigla Atour Abraham,<sup>a</sup> Tim Kox,<sup>b</sup> Mevoa Daniel,<sup>c</sup> Assaouka Todou Hypolite,<sup>c</sup> Nsangou Ngouh Issah,<sup>c</sup>

Daniel Manhouli Daawe,<sup>a</sup> Stephane Kenmoe<sup>b</sup> and Patrick Mountapmbeme Kouotou<sup>\*a,d</sup>

<sup>a</sup>National Advanced School of Engineering of Maroua, University of Maroua, P.O. Box 46, Maroua, Cameroon.

<sup>b</sup>Department of Theoretical Chemistry, University of Duisburg-Essen, Universitätsstr. 2, D-45141 Essen, Germany

<sup>c</sup>Departement of Chemistry, Faculty of Sciences, University of Maroua P.O. Box.: 814, Maroua, Cameroon

<sup>d</sup>Institute of Engineering Thermophysics, Chinese Academy of Sciences, Beijing 100190, China.

\*Corresponding authors

Prof. Dr. Patrick Mountapmbeme Kouotou , [mkpatrick1982@gmail.com](mailto:mkpatrick1982@gmail.com), Tel/Fax: +237 694379627

Dr. Stephane Kenmoe, [stephane.kenmoe@uni-due.de](mailto:stephane.kenmoe@uni-due.de), Tel: +49 201 183 2497, Fax: +49 201 183 2656

### **Table of Contents**

**Section S1:** Chemical composition analysis by EDS

**Section S2:** Computational Details

**Section S3:** Comparison of the catalytic MgCo<sub>2</sub>O<sub>4</sub> performance towards toluene oxidation with results in literature.

## Section S1: Chemical composition analysis by EDS

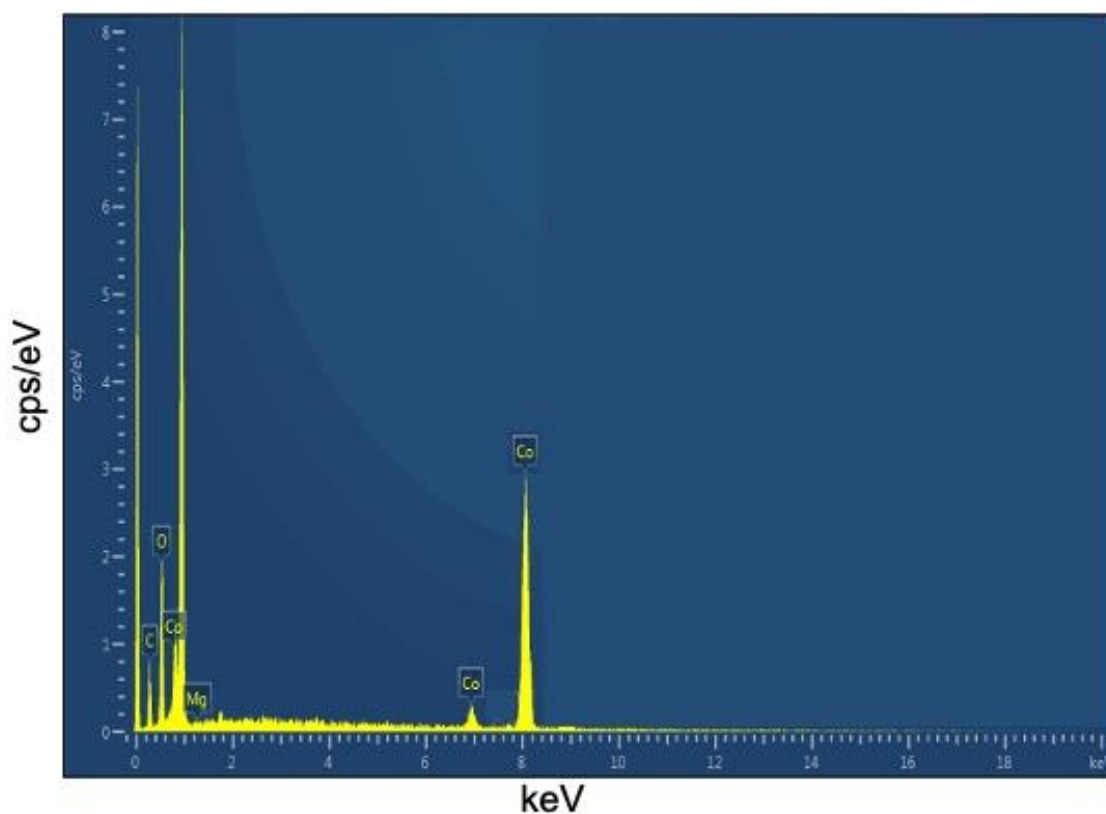

Figure S1: EDS pattern of MgCo<sub>2</sub>O<sub>4</sub> prepared by coprecipitation technique.

Table S1: EDS bulk elemental analysis of MgCo<sub>2</sub>O<sub>4</sub>

| Elements | Apparent concentration | k Ratio | wt%    | wt% Sigma | Atomic percentage |
|----------|------------------------|---------|--------|-----------|-------------------|
| C        | 1.80                   | 0.01799 | 7.73   | 2.50      | 10.47             |
| O        | 22.25                  | 0.07487 | 45.02  | 2.07      | 47.59             |
| Mg       | 0.08                   | 0.00050 | 15.41  | 0.60      | 13.33             |
| Co       | 9.56                   | 0.09561 | 31.84  | 1.67      | 28.61             |
| Total:   |                        |         | 100.00 |           | 100.00            |

## Section S2: Computational Details

Spin polarized Born-Oppenheimer molecular dynamics (MD) simulations were performed for a total time of 10 ps with a time step of 0.5 fs at the  $\Gamma$  point using the CP2K/Quickstep package.<sup>1</sup> The NVT ensemble was employed with a Nosé-Hoover thermostat [76,77] with target temperatures of 550 K and a time constant of 1 ps. The PBE-D3 functional with Hubbard [78] correction terms of  $U = 2.0$  eV [60] for Co was used to treat exchange and correlation. The Goedecker-Teter-Hutter (GTH) pseudopotentials [79] were used to treat the core electrons. The basis sets consist of plane waves with a cut-off of 500 Ry together with double- $\zeta$  quality local basis functions containing a single set of polarization functions (DZVP). The (111) surface can exhibit five different terminations, we used the termination with the smallest number of dangling bonds. This termination ends with metal ions, that are tetrahedrally or octahedrally coordinated with one or two dangling bonds, while one quarter of the oxygen atoms have one dangling bond. The  $\text{Co}_3\text{O}_4$  and  $\text{MgCo}_2\text{O}_4$  interface was modelled by stoichiometric slabs consisting of 13 atomic layers and two toluene molecules. The bottom 6 layers of the slab were kept frozen at their bulk positions, and the remaining atoms were fully relaxed and mobile as was the toluene molecules in the orthorhombic supercell with (2x2) periodicity in the lateral directions (x, y) and dimensions  $19.8127 \text{ \AA} \times 11.4389 \text{ \AA} \times 40.0 \text{ \AA}$  ( $\text{MgCo}_2\text{O}_4$ :  $20.0234 \text{ \AA} \times 11.5605 \text{ \AA} \times 40.0 \text{ \AA}$ ).

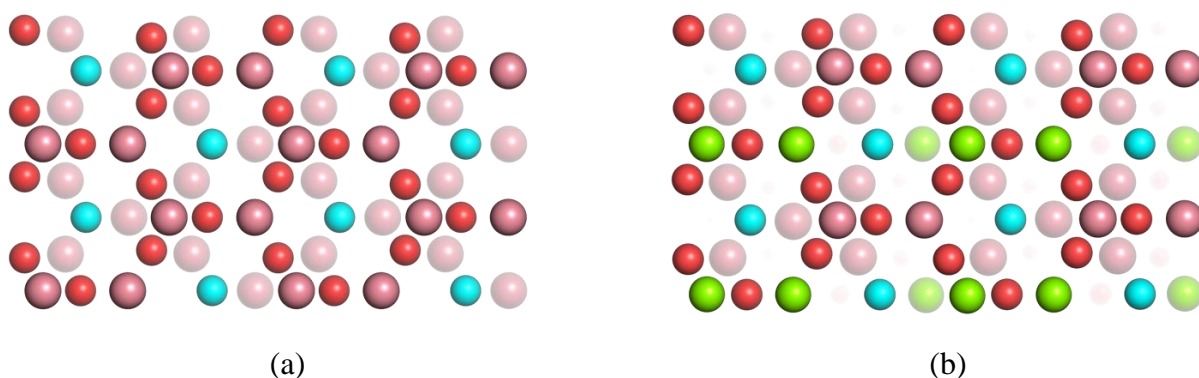

Figure S2: Top views of: (a)  $\text{Co}_3\text{O}_4(111)$  and (b)  $\text{MgCo}_2\text{O}_4(111)$  surfaces. Mg: green, Co: pink, slab oxygens: red, unsaturated slab oxygen with only 3 metal ions neighbors: cyan.

### Section S3: Comparison of the catalytic $\text{MgCo}_2\text{O}_4$ performance towards toluene oxidation with results in literature.

**Table S2:** Catalytic performance and test conditions of toluene over  $\text{MgCo}_2\text{O}_4$ ,  $\text{Co}_3\text{O}_4$  and other related catalysts earlier reported in the literature.

| Catalysts                            | Masse (g) | Concentration (ppm) | WHSV ( $\text{mL g}_{\text{cat}}^{-1}\text{h}^{-1}$ ) | $T_{90\%}$ | $T_{100\%}$ | Reference |
|--------------------------------------|-----------|---------------------|-------------------------------------------------------|------------|-------------|-----------|
| $\text{Co}_3\text{O}_4$              | 0.06      | 500                 | 20 000                                                |            | 315         | This work |
| $\text{Co}_3\text{O}_4$ microspheres |           | 1000                | 20 000                                                | 285        |             | [58]      |
| $\text{Co}_3\text{O}_4$ NS           |           | 1000                | 20 000                                                | -          | 300         | [65]      |
| $\text{Cu-Co}_3\text{O}_4$           |           | 1000                | 20000                                                 | 219        | 240         | [66]      |
| $\text{Co}_3\text{O}_4$              | 0.2       | 1000                | 20000                                                 | 316        | 340         | [44]      |
| $\text{MgCo}_2\text{O}_4$            | 0.06      | 500                 | 20 000                                                | 250        | 255         | This work |
| 6.4Au/bulk $\text{Co}_3\text{O}_4$   |           | 1000                | 20 000                                                | 277        | -           | [52]      |
| 7.4 Au/ $\text{Co}_3\text{O}_4$      |           | 1000                | 20 000                                                | 250        |             | [58]      |
| MnAl/Na-L(II)                        | 0.5       | 500                 | 10000                                                 | 260        | -           | [76]      |
| Pd/ $\text{Co}_3\text{AlO}$          | 0.6       | 1000                | 30 000                                                | 230        | 290         | [67]      |
